# Supplementary material for: The effect of grit on L2 willingness to communicate among Chinese junior high school students: an analysis of the differential roles of foreign language enjoyment and anxiety
Source: Front Psychol. 2024 Oct 11;15:1468464. doi: 10.3389/fpsyg.2024.1468464 (PMC11505123; doi:10.3389/fpsyg.2024.1468464)
Supplement: Supplementary file 1 [file Table_1.XLSX]

## Sheet: Sheet1
编号	性别	年龄	英语 学习 年限	有无 海外 经历	英语 学习 时间	A1	A2	A3	A4	A5	A6	不懈努力	B7	B8	B9	B10	如一兴趣	C11	C12	C13	C14	C15	C16	C17	C18	C19	C20	C21	外语愉悦	D22	D23	D24	D25	D26	D27	D28	D29	外语焦虑	E30	E31	E32	E33	E34	E35	E36	E37	E38	E39	交际意愿
1	1	13	7	无	1.5	2	1	3	4	4	3	2.83333	1	4	3	3	2.75	4	2	3	2	1	3	5	4	5	5	5	3.54545	3	3	3	4	3	3	1	2	2.75	5	3	3	3	4	4	4	3	3	3	3.5
2	1	13	7	无	2	1	3	3	3	3	2	2.5	4	4	4	4	4	4	4	4	4	5	2	2	2	2	4	1	3.09091	5	5	4	3	1	2	3	3	3.25	1	2	2	2	2	2	2	2	2	2	1.9
3	2	13	4	无	5	3	5	4	5	5	4	4.33333	5	1	3	1	2.5	3	1	2	1	1	3	1	5	3	1	1	2	1	5	5	5	3	2	4	2	3.375	1	1	1	2	1	1	1	1	1	1	1.1
4	1	13	8	无	3	3	5	5	4	4	3	4	2	3	4	4	3.25	4	4	4	2	2	4	5	5	5	5	4	4	1	4	2	3	3	2	1	3	2.375	3	4	2	5	5	2	4	5	4	3	3.7
5	2	14	8	无	1	5	5	5	5	5	5	5	5	5	5	5	5	5	5	5	5	5	5	1	5	5	5	1	4.27273	1	5	1	1	1	1	1	1	1.5	5	5	5	5	5	5	5	5	5	5	5
6	2	13	5	无	3	4	4	4	3	3	3	3.5	5	5	5	4	4.75	4	5	4	5	4	5	5	5	5	4	3	4.45455	4	3	5	3	2	2	5	4	3.5	2	3	2	4	3	2	5	5	4	3	3.3
7	2	13	5	无	3	3	3	3	3	4	3	3.16667	2	3	3	2	2.5	3	4	3	3	4	3	3	3	4	4	4	3.45455	3	3	1	3	4	3	3	3	2.875	3	3	2	4	4	2	2	2	3	3	2.8
8	1	14	6	无	2	3	2	4	4	4	4	3.5	2	2	2	2	2	4	4	4	1	1	2	2	3	3	2	4	2.72727	5	5	1	5	5	3	3	3	3.75	3	4	4	3	3	4	4	3	3	3	3.4
9	1	14	7	无	2	3	4	4	4	3	5	3.83333	2	4	4	3	3.25	3	4	4	3	2	3	4	4	4	4	3	3.45455	3	3	3	3	3	4	3	1	2.875	2	4	4	4	4	3	3	2	3	4	3.3
10	1	13	7	无	2	3	3	2	2	3	3	2.66667	3	3	3	3	3	3	3	3	3	3	3	3	3	3	3	3	3	3	3	3	3	3	3	3	3	3	3	3	3	3	3	3	3	3	3	3	3
11	2	13	4	无	1	3	4	4	3	4	2	3.33333	4	4	4	5	4.25	4	3	4	2	3	3	3	4	4	3	2	3.18182	3	2	3	3	4	4	4	4	3.375	1	2	2	3	3	3	4	4	3	2	2.7
12	2	13	7	无	3	4	3	3	4	4	5	3.83333	1	4	3	5	3.25	2	3	5	1	4	4	5	5	5	5	1	3.63636	2	5	2	3	3	2	2	3	2.75	3	1	1	3	2	2	3	2	3	2	2.2
13	2	13	5	无	4	3	3	3	3	3	3	3	2	2	2	2	2	2	2	2	2	4	4	3	3	3	3	3	2.81818	3	3	3	3	3	3	4	3	3.125	3	3	3	3	3	3	3	3	3	3	3
14	2	13	4	无	1	3	2	3	3	4	3	3	1	3	2	2	2	4	3	3	2	5	3	4	4	4	4	2	3.45455	3	3	2	2	2	2	4	1	2.375	2	3	3	3	3	4	1	5	5	1	3
15	1	14	6	无	2	3	3	3	4	4	4	3.4	2	2	2	2	2	2	2	3	2	2	4	4	4	5	5	3	3.27273	2	5	4	4	4	4	4	4	3.875	2	4	2	2	4	3	3	3	3	3	2.9
16	1	13	4	无	1	3	4	4	3	5	5	4	3	4	5	4	4	4	2	3	3	5	4	5	5	5	5	5	4.18182	5	2	3	2	2	1	3	1	2.375	4	4	5	5	4	5	4	4	3	5	4.3
17	2	13	4	无	2	3	2	4	3	3	3	2.8	2	3	3	3	2.75	3	3	3	3	3	3	4	4	4	3	3	3.27273	3	3	3	3	3	3	3	3	3	3	3	3	3	3	3	3	3	3	3	3
18	2	13	6	无	5	3	3	3	3	3	3	3	3	3	3	3	3	3	3	3	3	3	3	3	3	3	3	3	3	3	3	3	3	3	3	3	3	3	3	3	3	3	3	3	3	3	3	3	3
19	2	14	7	无	2	3	3	3	3	3	3	3	4	5	4	2	3.75	3	3	3	1	5	1	1	2	3	3	3	2.54545	3	3	3	3	3	3	3	3	3	3	3	3	4	3	3	3	4	2	3	3.1
20	1	13	6	无	1	3	2	3	2	4	2	2.66667	3	2	5	3	3.25	5	3	4	3	5	3	5	3	5	4	5	4.09091	1	4	1	2	1	5	1	1	2	3	3	5	5	5	2	4	3	4	5	3.9
21	2	13	5	无	2	3	4	5	5	5	5	4.5	3	5	3	4	3.75	5	5	5	3	4	4	4	4	4	4	4	4.18182	3	3	3	3	2	3	3	2	2.75	3	4	4	4	5	3	5	5	5	5	4.3
22	1	13	6	无	1	4	4	5	5	5	5	4.66667	5	5	5	5	5	5	5	5	3	5	5	5	5	5	5	5	4.81818	5	5	5	5	5	5	3	1	4.25	3	4	3	5	3	5	5	5	5	5	4.3
23	1	13	6	无	1	4	4	4	4	4	4	4	2	3	5	5	3.75	3	3	5	3	4	4	5	5	5	4	3	4	3	3	3	3	3	3	3	3	3	2	3	3	4	5	4	4	4	4	4	3.7
24	1	14	4	无	1	3	4	3	3	3	3	3.16667	4	5	3	4	4	4	3	2	1	1	3	3	5	5	5	3	3.18182	2	5	1	3	3	2	2	3	2.625	1	3	2	5	3	4	4	4	4	5	3.5
25	1	13	8	无	2	5	5	5	5	5	5	5	5	5	5	4	4.75	4	4	5	4	5	5	4	5	5	5	3	4.45455	1	3	2	3	1	3	1	2	2	3	4	4	4	4	4	4	4	4	5	4
26	2	13	5	无	2	3	4	3	3	4	3	3.33333	3	2	3	4	3	1	1	2	1	3	2	3	3	3	2	2	2.09091	4	5	4	4	4	4	5	3	4.125	3	1	1	1	3	2	4	4	3	3	2.5
27	1	13	3	无	2	4	5	4	4	5	4	4.33333	1	5	3	4	3.25	5	4	5	1	3	3	5	5	5	3	1	3.63636	4	4	1	5	5	5	3	1	3.5	4	5	3	4	1	3	4	5	5	5	3.9
28	1	14	5	无	1	2	4	4	5	5	3	3.83333	1	3	3	3	2.5	4	4	4	3	4	4	4	4	4	5	4	4	4	5	5	4	4	3	4	3	4	2	2	4	3	2	3	5	4	4	4	3.3
29	2	12	7	无	2	4	4	4	4	4	4	4	3	5	3	3	3.5	4	3	4	4	3	5	5	5	5	3	2	3.90909	3	3	3	2	1	1	3	1	2.125	3	3	3	3	3	3	3	3	3	3	3
30	1	13	8	无	1	3	3	3	3	4	4	3.33333	4	4	5	5	4.5	5	4	5	5	4	3	5	5	5	5	4	4.54545	4	3	3	3	3	3	3	2	3	3	4	4	5	3	5	5	5	5	5	4.4
31	1	13	5	无	1	4	3	3	5	5	4	4	3	1	2	2	2	3	2	4	5	5	3	3	3	5	5	3	3.72727	5	5	1	5	5	2	5	3	3.875	1	3	5	5	2	3	3	4	4	4	3.4
32	2	13	7	有/1个月	2.5	4	5	5	4	4	5	4.5	1	1	1	1	1	4	5	5	5	5	5	5	5	5	4	5	4.81818	1	2	5	3	5	1	1	1	2.375	5	5	5	1	1	5	5	5	5	5	4.2
33	2	14	4	无	1.5	3	3	3	3	3	3	3	3	3	2	3	2.75	3	2	2	2	2	2	3	3	3	2	1	2.27273	3	3	2	4	4	4	4	2	3.25	3	2	2	2	2	2	2	2	2	2	2.1
34	2	13	7	无	2	4	4	5	5	5	5	4.66667	3	4	4	4	3.75	5	5	4	3	5	4	5	5	5	5	5	4.63636	1	3	2	1	1	1	2	2	1.625	3	4	4	4	4	5	5	5	5	5	4.4
35	1	13	4	无	2	4	3	4	5	5	5	4.33333	3	5	4	4	4	5	5	5	4	5	4	5	5	5	5	3	4.63636	4	4	2	1	2	2	3	2	2.5	2	4	4	4	5	3	4	4	3	2	3.5
36	1	14	6	无	1	5	5	5	4	3	5	4.5	3	1	1	3	2	5	3	5	3	5	5	5	5	5	4	3	4.36364	5	5	4	5	5	1	5	1	3.875	5	5	5	5	3	3	3	4	3	5	4.1
37	1	13	7	无	2	4	3	2	3	3	4	3.16667	2	3	3	4	3	4	4	3	3	4	5	3	3	3	3	1	3.27273	1	1	1	5	1	1	1	1	1.5	1	3	3	3	3	3	3	3	3	3	2.8
38	1	13	4	无	3	3	4	4	4	4	3	3.66667	3	5	3	5	4	4	4	5	4	3	3	5	5	5	3	1	3.81818	5	5	4	1	1	4	5	3	3.5	3	4	3	2	2	1	1	1	1	1	1.9
39	1	13	3	无	1	4	4	3	4	5	4	4	4	5	4	5	4.5	4	3	4	2	4	4	5	5	5	4	3	3.90909	1	2	1	2	3	2	1	1	1.625	1	3	4	2	4	3	4	2	2	2	2.7
40	1	13	6	无	5	4	3	4	4	5	5	4.16667	4	5	5	5	4.75	5	4	5	4	5	5	5	5	5	4	2	4.45455	3	4	1	1	1	3	4	1	2.25	5	5	5	4	3	4	2	2	2	4	3.6
41	2	14	5	无	1	3	1	5	5	5	5	4	1	5	5	5	4	5	5	4	1	5	5	5	5	5	5	5	4.54545	5	5	5	1	1	5	5	5	4	5	5	5	5	5	5	5	5	5	5	5
42	2	14	4	无	1	3	5	5	5	5	5	4.66667	1	5	5	5	4	5	5	5	5	5	5	5	5	5	5	5	5	1	1	1	1	1	1	1	1	1	5	5	5	5	3	5	5	5	5	5	4.8
43	2	12	6	无	1	3	3	3	3	3	3	3	2	4	4	4	3.5	3	3	3	2	4	3	4	4	4	3	2	3.18182	4	4	3	4	4	3	3	2	3.375	2	2	2	2	2	2	2	1	1	1	1.7
44	1	13	4	无	1.5	3	2	3	4	3	4	3.16667	1	5	5	5	4	3	3	3	2	4	3	4	3	4	3	3	3.18182	3	3	1	1	3	3	3	3	2.5	3	3	3	3	2	1	1	1	1	1	1.9
45	1	14	5	无	1	4	4	4	4	4	4	4	1	5	5	5	4	5	4	4	3	4	4	4	4	4	4	4	4	1	3	2	3	3	2	3	1	2.25	2	4	3	3	5	4	4	4	4	4	3.7
46	2	13	4	无	2	3	3	3	3	4	4	3.33333	2	5	5	5	4.25	5	5	5	3	5	5	5	5	5	5	3	4.63636	3	4	3	3	3	2	2	2	2.75	3	4	3	4	5	3	5	5	5	5	4.2
47	2	13	6	无	2	5	5	5	5	5	4	4.83333	4	5	5	5	4.75	4	4	5	4	4	5	5	5	5	5	5	4.63636	2	2	2	2	2	2	2	2	2	4	4	4	4	5	3	3	3	4	4	3.8
48	2	14	4	无	1	4	4	5	4	5	5	4.5	3	5	5	5	4.5	5	4	4	3	2	5	5	5	5	5	3	4.18182	2	3	2	3	4	3	3	3	2.875	3	4	4	3	3	3	4	4	5	5	3.8
49	2	13	7	有/7天	2	4	5	4	4	4	4	4.16667	3	5	5	5	4.5	5	4	4	3	4	4	5	5	5	4	3	4.18182	5	5	4	4	3	4	3	4	4	3	4	5	3	4	3	4	4	3	4	3.7
50	2	13	4	无	2	3	2	3	3	4	2	2.83333	2	3	1	3	2.25	4	3	5	3	3	4	3	4	4	4	3	3.63636	5	3	4	5	1	5	5	5	4.125	2	2	3	3	3	4	5	5	5	4	3.6
51	1	14	4	无	1	2	5	5	4	5	3	4	1	5	3	3	3	4	3	3	1	1	4	4	4	4	3	1	2.90909	4	4	4	4	4	4	4	1	3.625	4	5	5	5	5	4	4	4	4	4	4.4
52	1	13	5	无	2	3	3	3	3	3	3	3	2	3	3	3	2.75	3	4	4	3	3	4	4	4	4	3	3	3.54545	3	3	3	5	3	3	3	3	3.25	3	3	2	2	1	3	2	2	2	2	2.2
53	2	13	5	无	1	3	3	3	3	3	4	3.16667	4	5	3	4	4	4	3	2	2	5	3	4	4	4	5	4	3.63636	3	4	3	4	4	3	3	2	3.25	3	2	5	2	3	4	2	3	4	2	3
54	2	13	4	无	1	3	4	5	4	5	4	4.16667	2	5	5	2	4	4	4	4	3	3	4	3	4	4	3	2	3.45455	2	2	4	3	3	3	4	4	3.125	2	4	3	3	4	3	3	3	2	4	3.1
55	2	13	4	无	2	3	3	3	3	3	4	3.16667	1	4	4	3	3	4	3	3	2	3	3	2	4	4	3	2	3	4	5	4	4	4	3	4	3	3.875	1	2	1	3	3	2	5	5	5	2	2.9
56	1	14	4	无	2	3	5	5	5	5	4	4.5	2	3	3	1	2.25	4	3	5	5	5	3	5	5	5	5	5	4.54545	5	5	5	1	1	5	5	5	4	5	5	4	5	1	2	3	3	5	5	3.8
57	2	13	4	无	3	3	4	3	3	2	3	3	3	5	5	3	4	3	4	4	3	3	4	4	4	4	4	3	3.63636	3	2	2	3	3	3	3	4	2.875	1	1	1	3	2	1	5	5	5	5	2.9
58	2	13	4	无	2	3	3	4	3	5	4	3.66667	1	5	4	5	3.75	4	4	5	3	4	4	5	5	4	4	3	4.09091	4	5	3	5	2	3	3	1	3.25	3	4	3	3	4	3	4	4	4	4	3.6
59	1	13	4	有/8天	1	5	5	5	4	4	4	4.5	1	5	5	5	4	5	5	5	3	2	5	2	1	3	1	1	3	1	1	5	2	5	1	1	1	2.125	5	5	5	5	5	5	5	5	5	5	5
60	2	13	6	无	2	4	4	5	4	5	3	4.16667	2	5	5	1	3.25	4	5	4	3	4	5	5	5	5	5	3	4.36364	5	5	5	5	4	5	5	3	4.625	3	5	3	5	3	5	4	5	5	4	4.2
61	1	14	6	无	1	4	3	3	3	5	5	3.83333	2	5	5	5	4.25	5	5	5	4	4	5	5	5	5	5	3	4.63636	4	1	1	1	1	3	4	3	2.25	3	3	3	3	3	3	3	3	3	3	3
62	2	13	5	无	1	4	3	5	4	5	4	4.16667	5	5	5	5	5	5	5	4	3	3	5	5	5	5	3	2	4.09091	3	2	5	3	3	3	3	1	2.875	2	4	2	4	4	3	4	5	5	4	3.7
63	2	13	5	无	3	1	4	3	5	3	4	3.33333	2	5	5	5	4.25	5	5	5	3	3	5	5	5	5	4	2	4.27273	1	2	3	3	1	1	1	1	1.625	3	5	5	5	5	5	5	5	5	5	4.8
64	1	12	4	无	3	2	3	3	3	3	3	2.83333	1	2	1	1	1.25	2	1	4	1	3	2	3	4	4	4	2	2.72727	3	4	3	3	3	3	4	3	3.25	4	4	4	3	1	2	3	3	3	3	3
65	1	13	5	无	2.5	5	5	3	4	5	5	4.5	1	5	5	5	4	5	3	3	2	4	4	4	4	4	5	3	3.72727	1	1	1	1	1	1	1	1	1	5	4	5	3	4	3	4	4	3	3	3.8
66	2	13	7	无	2	3	3	3	3	4	3	3.16667	2	5	4	4	3.75	3	3	3	3	4	3	5	5	5	5	3	3.81818	4	5	4	3	3	3	4	3	3.625	2	3	3	3	3	3	3	3	3	3	2.9
67	1	13	4	无	1	5	5	5	5	5	4	4.83333	4	5	5	5	4.75	5	4	5	4	4	5	5	5	5	4	4	4.54545	3	3	3	2	2	2	3	2	2.5	4	4	4	5	5	5	5	5	5	5	4.7
68	1	13	6	无	1	5	5	5	5	5	5	5	3	5	5	1	3.5	1	1	5	1	5	1	5	5	5	5	1	3.18182	5	5	5	5	1	5	5	1	4	1	1	1	1	5	5	5	5	5	1	3
69	1	13	6	无	2	5	5	5	5	5	5	5	5	5	5	5	5	5	5	5	5	5	5	5	5	5	5	5	5	1	1	1	1	1	1	1	1	1	5	5	5	5	5	5	5	5	5	5	5
70	1	13	6	无	2	5	5	3	4	5	5	4.5	1	5	5	5	4	5	3	3	2	4	4	4	4	4	5	3	3.72727	1	1	1	1	1	1	1	1	1	5	4	5	3	4	3	4	4	3	3	3.8
71	1	13	5	无	2.5	4	5	5	4	5	4	4.5	4	5	5	5	4.75	5	5	5	4	5	5	5	5	5	5	5	4.90909	5	4	3	3	4	3	4	2	3.5	4	4	4	4	3	3	3	3	3	3	3.4
72	1	13	4	无	3	3	3	3	3	3	4	3.16667	3	5	5	5	4.5	5	4	5	3	5	5	5	5	5	5	5	4.72727	3	2	3	3	3	1	3	3	2.625	4	3	3	3	2	3	3	3	3	3	3
73	2	14	4	无	2.5	2	3	3	3	3	3	2.83333	2	3	3	2	2.5	3	2	3	1	3	2	4	4	4	2	2	2.72727	5	5	5	5	5	4	5	5	4.875	3	3	2	3	3	2	1	2	2	2	2.3
74	2	13	4	无	3	3	3	3	3	3	3	3	2	2	2	2	2	4	4	4	3	3	3	3	5	5	5	1	3.63636	3	3	5	4	1	2	2	3	2.875	2	3	3	3	2	3	3	3	3	3	2.8
75	1	14	9	无	2.5	2	3	3	3	4	3	3	4	3	3	4	3.5	4	3	4	3	3	4	3	4	3	3	4	3.45455	3	3	3	3	3	3	3	3	3	3	3	3	3	3	3	3	3	3	3	3
76	1	13	5	无	1.5	4	5	5	4	5	5	4.66667	1	5	5	5	4	4	4	5	5	4	4	5	5	5	4	5	4.54545	5	3	4	5	2	1	2	1	2.875	5	5	5	5	5	5	5	5	5	4	4.9
77	1	14	4	无	1	3	4	3	3	4	4	3.5	3	5	3	4	3.75	4	3	4	2	2	2	2	5	5	4	1	3.09091	4	3	2	2	4	3	4	3	3.125	2	3	4	3	2	3	3	3	2	2	2.7
78	2	13	4	无	2	3	3	4	3	3	3	3.16667	5	5	5	4	4.75	3	4	3	3	3	5	5	5	3	3	1	3.45455	1	1	1	2	1	1	1	4	1.5	4	4	4	5	5	5	5	5	5	5	4.7
79	2	13	5	无	1.5	4	3	5	4	4	4	4	1	4	3	4	3	4	3	4	3	3	4	5	5	5	4	3	3.90909	3	3	2	3	3	3	2	2	2.625	3	4	4	3	3	3	3	4	4	3	3.4
80	1	12	7	无	2	5	5	5	5	5	5	5	5	5	5	5	5	5	5	5	5	5	5	5	5	5	5	5	5	5	5	5	5	5	5	5	5	5	5	5	5	5	5	5	5	5	5	5	5
81	2	12	4	无	2.5	3	3	3	3	3	3	3	1	2	2	5	2.5	2	1	1	1	3	1	3	3	3	3	2	2.09091	5	5	5	5	5	5	5	5	5	1	1	1	1	1	1	1	1	1	1	1
82	1	15	4	无	2	3	3	4	5	5	4	4	1	5	5	3	3.5	4	3	5	2	5	4	5	5	5	5	5	4.36364	2	3	3	4	2	2	2	2	2.5	4	2	4	3	3	3	4	4	4	4	3.5
83	1	14	4	无	3	3	3	3	3	5	4	3.5	2	5	5	5	4.25	4	4	4	2	3	4	5	5	5	5	4	4.09091	5	5	5	1	3	1	1	1	2.75	4	2	1	2	1	5	5	5	5	5	3.5
84	1	14	3	无	2.5	3	5	5	3	4	5	4.16667	5	5	4	4	4.5	5	3	4	1	5	5	5	5	5	4	3	4.09091	2	5	3	3	3	3	4	4	3.375	2	2	2	5	3	1	1	2	3	3	2.4
85	1	13	4	无	2	3	3	4	4	4	4	3.66667	2	4	4	4	3.5	4	4	4	3	4	4	4	4	4	4	3	3.81818	2	2	2	2	2	2	2	2	2	3	3	4	4	4	4	4	3	3	3	3.5
86	1	13	7	无	2	5	5	5	5	5	5	5	2	5	5	4	4	5	5	5	4	5	5	5	5	5	5	5	4.90909	3	4	4	4	2	3	2	2	3	2	3	3	5	3	3	3	4	4	4	3.4
87	1	13	5	无	2.5	4	4	4	4	5	5	4.33333	3	5	5	5	4.5	4	4	5	5	3	4	5	5	5	3	2	4.09091	2	2	2	3	2	3	3	2	2.375	5	5	5	5	5	4	3	3	3	3	4.1
88	2	14	5	无	1	3	3	3	3	2	3	2.83333	3	3	3	3	3	3	3	3	1	3	2	3	3	3	5	3	2.90909	3	5	5	1	1	3	3	4	3.125	2	3	3	3	3	3	3	3	3	3	2.9
89	2	13	5	无	1.5	4	4	5	5	5	5	4.66667	3	5	5	4	4.25	5	5	5	4	2	5	5	5	5	3	1	4.09091	4	3	1	1	1	1	2	1	1.75	4	5	5	5	3	3	5	5	4	4	4.3
90	2	13	5	无	1	3	3	4	4	4	3	3.5	2	5	3	3	3.25	4	3	3	3	3	3	3	4	3	3	3	3.18182	3	3	4	3	3	4	3	4	3.375	3	3	4	3	3	3	4	4	3	3	3.3
91	2	14	4	无	1	4	4	3	4	4	4	3.83333	3	5	5	5	4.5	4	4	4	3	4	4	5	5	5	4	3	4.09091	2	3	3	3	3	2	2	1	2.375	3	3	4	4	3	3	3	3	3	3	3.2
92	1	13	4	无	1.5	3	1	3	3	2	2	2.33333	2	4	5	4	3.75	3	3	4	4	2	3	3	3	5	4	1	3.18182	1	2	2	4	3	3	4	3	2.75	3	2	2	4	1	1	1	1	2	1	1.8
93	1	13	3	无	2	3	3	3	3	3	4	3.16667	5	5	5	5	5	4	4	5	3	1	4	4	4	3	3	1	3.27273	1	1	1	2	2	1	1	1	1.25	4	4	4	3	1	1	3	3	3	3	2.9
94	1	13	7	无	2	5	1	5	1	1	1	2.33333	5	5	5	5	5	3	4	5	5	1	1	1	1	1	1	1	2.18182	1	1	1	1	1	1	5	5	2	5	5	1	1	1	1	1	1	1	5	2.2
95	1	13	5	无	2	4	3	4	4	4	4	3.83333	3	5	3	5	4	3	3	3	1	4	4	5	5	5	3	3	3.54545	5	5	5	5	5	5	1	4	4.375	3	3	3	3	3	3	3	5	5	3	3.4
96	2	12	5	无	2	3	3	4	3	3	4	3.33333	2	4	4	4	3.5	3	3	3	1	3	3	4	4	4	3	2	3	3	3	2	3	3	2	2	3	2.625	1	3	3	3	3	3	3	3	3	3	2.8
97	1	13	8	无	2	3	3	3	3	3	3	3	1	5	5	3	3.5	1	1	3	1	3	1	1	3	1	3	1	1.72727	5	1	5	5	5	5	5	5	4.5	1	2	1	1	2	1	5	5	5	5	2.8
98	2	13	4	无	0.5	2	3	3	3	3	3	2.83333	3	2	2	4	2.75	2	2	2	2	2	2	3	4	4	2	1	2.36364	4	4	4	4	4	4	2	2	3.5	2	3	3	2	3	1	1	2	3	2	2.2
99	2	14	6	无	4	3	3	3	4	4	3	3.33333	2	4	3	3	3	3	3	3	3	1	4	4	4	4	2	3	3.09091	5	3	4	5	5	4	4	3	4.125	3	3	2	2	2	3	3	3	3	3	2.7
100	1	13	4	无	2	4	4	5	4	4	5	4.33333	5	5	5	5	5	1	5	4	4	5	4	4	5	4	5	4	4.09091	4	4	2	1	1	1	5	4	2.75	4	5	4	5	4	5	5	5	4	5	4.6
101	2	12	6	无	3	4	4	5	5	5	4	4.5	2	5	5	5	4.25	5	4	5	3	4	5	5	5	5	5	2	4.36364	2	2	1	2	2	1	2	2	1.75	3	4	4	4	4	4	5	5	5	4	4.2
102	2	13	5	无	2	4	3	4	5	5	5	4.33333	3	5	5	5	4.5	5	5	5	4	5	5	5	5	5	5	4	4.81818	1	1	1	2	2	1	3	1	1.5	4	4	4	4	4	4	4	5	5	5	4.3
103	2	13	4	无	2.5	3	3	3	3	3	3	3	3	4	4	4	3.75	4	3	3	3	1	3	4	4	4	1	1	2.81818	2	2	3	4	4	4	3	3	3.125	2	2	2	2	2	2	3	2	2	3	2.2
104	1	14	4	无	1	4	3	3	3	4	5	3.66667	2	5	5	3	3.75	4	4	5	3	3	4	4	5	5	3	2	3.81818	3	3	4	2	3	3	3	3	3	2	3	3	2	2	2	3	3	2	2	2.4
105	1	13	2	无	3	2	3	3	4	3	5	3.33333	5	5	5	5	5	1	3	2	2	4	4	4	4	4	4	3	3.18182	1	1	4	5	4	3	4	3	3.125	1	3	1	3	4	4	4	4	4	4	3.2
106	1	14	6	无	1.5	3	4	4	5	4	2	3.66667	5	5	5	5	5	3	5	5	3	3	4	5	5	5	3	2	3.90909	1	2	1	3	3	1	2	1	1.75	2	3	3	2	3	2	2	2	3	3	2.5
107	2	13	6	无	2	3	2	3	3	3	3	2.83333	2	4	4	4	3.5	4	4	2	4	2	3	3	4	4	4	3	3.36364	2	4	3	3	3	2	3	3	2.875	2	3	3	3	4	4	4	4	3	3	3.3
108	2	13	6	无	2	3	3	3	3	3	3	3	3	4	4	4	3.75	3	3	3	2	2	3	5	4	5	3	3	3.27273	2	3	3	3	4	4	5	3	3.375	3	3	3	2	3	3	5	5	5	3	3.5
109	1	14	7	无	1	3	3	4	3	3	3	3.16667	3	2	2	3	2.5	3	3	4	3	4	3	4	5	5	5	5	4	3	5	3	2	4	3	4	1	3.125	3	1	3	2	3	4	3	3	3	4	2.9
110	1	14	7	无	2	3	3	2	3	3	3	2.83333	5	4	2	3	3.5	5	1	1	2	1	1	5	5	5	1	1	2.54545	4	2	2	5	3	1	1	1	2.375	1	1	1	1	2	1	1	1	1	1	1.1
111	2	13	5.5	无	2	3	4	3	3	3	4	3.33333	1	4	2	2	2.25	3	3	4	2	3	3	4	4	4	2	1	3	2	4	4	4	4	3	4	4	3.625	1	1	2	2	2	1	5	4	4	2	2.4
112	2	13	6	无	2	3	2	3	3	3	3	2.83333	2	4	4	4	3.5	4	2	4	2	3	3	4	4	4	3	2	3.18182	4	4	3	3	3	2	3	3	3.125	3	2	3	3	3	4	4	4	3	3	3.2
113	2	12	7	无	2	3	3	3	3	3	3	3	3	4	4	4	3.75	3	3	3	2	2	3	5	4	5	3	3	3.27273	2	3	3	3	4	4	5	3	3.375	3	3	3	2	3	3	5	5	5	3	3.5
114	1	13	5	无	1	3	3	4	3	3	3	3.16667	3	2	2	3	2.5	3	3	4	3	4	3	4	5	5	5	5	4	3	5	3	2	4	3	4	1	3.125	3	1	3	2	3	4	3	3	3	4	2.9
115	1	14	6	无	2	3	3	2	3	3	3	2.83333	5	4	2	3	3.5	5	1	1	2	1	1	5	5	5	1	1	2.54545	4	2	2	5	3	1	1	1	2.375	1	1	1	1	2	1	1	1	1	1	1.1
116	2	13	5	无	2	3	4	3	3	3	4	3.33333	1	4	2	2	2.25	3	3	4	2	3	3	4	4	4	2	1	3	2	4	4	4	4	3	4	4	3.625	1	1	2	2	2	1	5	4	4	2	2.4
117	2	13	6	无	2	4	3	4	4	4	4	3.83333	4	4	4	4	4	4	4	4	3	3	4	4	4	4	4	3	3.72727	4	5	5	4	3	5	5	5	4.5	4	4	3	3	3	5	4	4	4	4	3.8
118	1	12	5	无	1.5	3	3	3	3	3	3	3	1	2	1	1	1.25	4	3	3	2	3	3	3	1	3	3	3	2.81818	5	5	5	3	1	1	5	3	3.5	1	1	1	1	1	1	1	1	1	1	1
119	2	13	5	无	2.5	4	3	4	4	4	3	3.66667	2	4	4	4	3.5	3	3	4	2	2	4	4	5	4	3	2	3.27273	2	2	2	3	4	3	3	3	2.75	1	1	1	1	4	2	5	4	5	5	2.9
120	1	14	6	无	3.5	3	3	3	3	3	3	3	1	1	1	5	2	3	2	1	1	1	1	4	3	3	1	1	1.90909	5	5	5	5	5	5	5	5	5	1	1	1	1	1	2	2	2	2	2	1.5
121	2	14	5	无	3	3	3	3	3	3	3	3	3	3	3	3	3	3	3	3	3	3	3	3	3	3	3	3	3	3	3	3	3	3	3	3	3	3	3	3	3	3	3	3	3	3	3	3	3
122	1	14	6	无	1.5	4	4	4	5	5	5	4.5	3	5	4	2	3.5	5	5	3	2	5	5	5	5	5	3	3	4.18182	2	4	4	3	3	3	4	3	3.25	2	4	5	5	4	3	3	4	4	5	3.9
123	1	14	6	无	2	1	1	4	1	1	5	2.16667	1	1	2	2	1.5	4	4	4	1	4	4	5	5	5	5	1	3.81818	4	5	1	5	1	1	1	5	2.875	5	1	1	1	5	1	1	1	5	5	2.6
124	1	13	4	无	2	3	3	3	3	3	3	3	2	2	2	2	2	2	2	3	2	4	3	3	4	3	3	3	2.90909	4	4	4	4	4	4	5	5	4.25	2	1	1	1	1	2	2	2	2	2	1.6
125	1	13	4	无	2	4	3	4	3	3	3	3.33333	2	5	5	5	4.25	4	3	4	4	3	3	4	5	4	3	3	3.63636	3	3	2	3	3	2	3	2	2.625	2	2	2	3	2	2	3	3	3	3	2.5
126	2	14	8	无	4	3	3	3	3	3	3	3	2	4	3	3	3	3	1	1	1	2	1	3	3	3	1	1	1.81818	5	5	5	4	5	5	5	3	4.625	1	1	1	2	1	2	2	2	2	1	1.5
127	2	15	5	无	1	3	3	3	3	3	3	3	4	4	4	3	3.75	2	3	4	1	3	3	4	4	4	2	1	2.81818	2	1	5	1	1	5	5	5	3.125	1	1	1	1	4	4	3	5	5	5	3
128	2	15	5	无	3	3	3	3	3	3	3	3	2	4	2	3	2.75	4	3	3	1	3	3	3	3	3	3	3	2.90909	4	4	4	3	3	4	4	4	3.75	4	3	3	3	3	3	4	4	4	3	3.4
129	1	14	5.5	无	1	4	3	3	3	5	4	3.66667	1	4	4	5	3.5	3	1	2	1	5	3	5	5	5	5	3	3.45455	5	5	1	5	5	3	5	3	4	3	3	2	2	1	1	1	1	1	1	1.6
130	1	13	6	无	3	5	5	5	3	5	5	4.66667	2	5	4	5	4	5	5	5	3	3	5	4	4	4	4	3	4.09091	2	3	3	4	3	3	3	1	2.75	1	2	5	3	2	1	4	4	4	4	3
131	1	13	5	无	3	5	4	5	4	5	4	4.5	3	5	5	5	4.5	5	4	4	4	3	5	5	5	5	2	4	4.18182	3	3	1	4	2	1	3	2	2.375	3	3	3	4	2	1	4	4	4	4	3.2
132	2	14	5	无	2	4	3	3	3	3	3	3.16667	2	3	2	2	2.25	3	3	3	1	3	3	4	5	5	3	3	3.27273	4	4	4	3	4	3	3	3	3.5	2	2	2	3	3	3	4	4	4	3	3
133	1	14	6	无	3	5	3	3	3	3	3	3.33333	3	5	5	4	4.25	3	3	3	3	3	3	3	3	3	3	3	3	3	1	1	5	1	1	3	1	2	5	5	5	5	5	4	4	4	4	4	4.5
134	2	15	6	无	3	3	3	3	3	4	3	3.16667	1	4	2	3	2.5	4	3	4	2	2	4	4	4	4	3	4	3.45455	5	4	4	4	3	5	3	2	3.75	3	3	3	3	3	4	5	5	5	3	3.7
135	1	13	6	无	1.5	4	3	4	4	4	5	4	4	4	3	4	3.75	4	4	3	3	3	4	4	4	4	3	2	3.45455	3	3	2	4	3	3	4	3	3.125	2	2	2	2	2	2	3	3	2	2	2.2
136	1	14	5	无	2	3	3	4	3	4	3	3.33333	3	4	4	3	3.5	3	3	3	3	2	3	3	3	3	2	2	2.72727	2	3	2	3	3	1	1	1	2	1	1	3	2	3	1	2	4	3	3	2.3
137	2	14	6	无	3	2	3	4	3	3	2	2.83333	3	3	3	2	2.75	4	3	5	1	3	3	3	3	4	4	3	3.27273	5	5	5	5	5	5	5	4	4.875	1	1	1	2	1	1	3	1	4	1	1.6
138	1	14	6	无	2	3	3	3	3	3	4	3.16667	2	5	5	5	4.25	4	4	3	2	3	4	5	5	5	4	3	3.81818	3	4	4	3	3	3	3	3	3.25	2	3	4	2	3	3	3	4	5	2	3.1
139	2	14	7	无	2	4	3	4	4	3	3	3.5	3	5	4	2	3.5	5	2	4	3	3	4	5	5	5	4	3	3.90909	3	2	2	3	4	4	3	2	2.875	3	2	3	3	4	3	4	4	4	3	3.3
140	1	14	6	无	2	4	4	4	5	5	4	4.33333	1	4	3	4	3	4	3	5	3	5	5	5	5	5	4	2	4.18182	3	2	4	2	3	3	4	1	2.75	1	2	4	3	2	1	4	4	4	4	2.9
141	1	14	6	无	2	4	3	4	4	4	3	3.66667	4	5	5	5	4.75	4	4	5	4	3	4	5	5	5	4	3	4.18182	5	4	4	3	3	4	5	3	3.875	1	1	1	4	3	5	5	5	5	5	3.5
142	2	13	7	无	2	3	3	3	2	3	4	3	1	5	4	5	3.75	4	3	4	2	4	3	5	5	5	5	2	3.81818	3	5	1	3	3	2	3	1	2.625	1	3	3	1	2	1	3	1	2	1	1.8
143	1	13	6	无	3	3	4	4	4	4	3	3.66667	3	5	4	4	4	4	3	4	3	4	3	4	4	5	4	3	3.72727	3	4	3	3	3	3	2	3	3	3	2	3	4	3	3	4	5	5	3	3.5
144	2	14	6	无	3	3	5	3	2	4	3	3.33333	2	4	4	4	3.5	4	3	5	1	3	3	5	5	5	4	3	3.72727	4	5	5	1	5	5	5	5	4.375	1	1	1	1	4	2	4	4	4	1	2.3
145	1	13	6	无	2	3	2	4	3	3	4	3.16667	3	5	4	4	4	3	2	4	4	5	4	4	4	4	5	4	3.90909	2	2	3	4	3	1	2	3	2.5	4	3	3	4	2	4	2	2	2	2	2.8
146	2	14	6	无	2	4	4	5	5	5	5	4.66667	1	4	3	3	2.75	5	4	5	1	5	4	5	5	5	5	2	4.18182	4	4	4	5	5	4	5	5	4.5	2	2	3	4	3	4	4	4	4	4	3.4
147	2	15	6	无	2	3	3	3	2	2	3	2.66667	4	4	3	3	3.5	4	2	2	2	3	2	3	4	4	3	2	2.81818	3	4	3	2	3	4	4	3	3.25	2	2	2	2	2	2	3	3	3	2	2.3
148	2	14	5	无	4	3	3	4	4	4	4	3.66667	5	5	5	5	5	5	4	4	3	3	3	3	4	3	4	2	3.45455	4	3	5	5	2	4	5	4	4	1	1	1	4	2	4	3	3	3	3	2.5
149	2	15	6	无	1.5	3	3	3	3	3	3	3	3	4	4	3	3.5	1	2	3	2	2	2	3	3	3	2	2	2.27273	3	2	3	5	3	2	3	5	3.25	3	2	2	2	3	3	3	3	3	2	2.6
150	2	13	6	无	1.5	4	4	5	4	5	4	4.33333	3	5	5	5	4.5	4	4	4	3	4	4	4	4	5	5	5	4.18182	4	4	4	3	3	4	3	4	3.625	4	3	3	4	4	4	4	4	4	4	3.8
151	1	13	5	无	1.5	5	5	5	4	5	5	4.83333	3	4	5	5	4.25	5	4	5	3	5	5	5	5	5	5	2	4.45455	3	4	3	4	3	3	3	2	3.125	5	5	5	5	3	5	5	5	5	3	4.6
152	2	14	5	有/6天	1.5	5	5	5	5	5	5	5	3	5	5	5	4.5	5	5	5	3	5	5	5	5	5	5	3	4.63636	2	3	1	1	3	2	2	1	1.875	3	3	3	3	3	3	5	5	5	4	3.7
153	2	13	6	无	3	3	2	3	2	2	2	2.33333	2	2	2	2	2	3	3	2	1	3	2	4	4	4	3	2	2.81818	4	4	5	2	2	2	2	4	3.125	4	4	2	2	2	2	4	1	1	1	2.3
154	1	14	7	无	2	5	5	5	5	5	5	5	3	4	5	5	4.25	5	5	5	5	5	5	5	5	5	5	3	4.81818	3	2	3	3	3	3	3	1	2.625	5	5	5	5	4	5	5	5	5	2	4.6
155	2	14	6	无	2	3	4	4	5	5	3	4	3	5	3	3	3.5	4	4	5	3	5	4	5	5	5	4	3	4.27273	5	4	3	4	5	3	4	1	3.625	3	3	3	3	4	4	4	4	3	3	3.4
156	1	13	5	无	1.5	5	4	4	5	5	4	4.5	5	5	5	5	5	5	5	5	3	4	5	5	5	5	4	3	4.45455	1	2	1	2	4	1	2	2	1.875	2	2	2	3	2	2	2	2	2	2	2.1
157	2	14	5	无	1	3	3	3	3	3	3	3	1	3	3	3	2.5	4	3	3	1	3	3	2	3	3	3	3	2.81818	1	2	2	1	2	3	2	1	1.75	1	1	1	1	4	1	1	1	2	1	1.4
158	1	14	8	无	2	3	2	2	3	3	3	2.66667	1	1	1	1	1	3	1	4	1	1	3	1	3	2	1	1	1.90909	4	5	5	5	5	5	5	1	4.375	1	1	1	1	1	1	1	1	1	1	1
159	1	13	7	无	1	3	3	3	3	2	4	3	2	3	2	2	2.25	2	2	2	2	3	2	3	3	3	3	2	2.45455	3	4	4	3	2	4	5	5	3.75	1	1	1	1	1	3	3	3	3	3	2
160	2	14	6	无	3	5	4	4	5	5	5	4.66667	3	5	5	5	4.5	4	4	5	5	3	5	4	4	4	3	3	4	1	3	1	1	1	1	3	1	1.5	5	3	5	4	5	4	4	4	4	4	4.2
161	1	13	6	有	1	3	3	3	4	4	3	3.33333	4	4	3	2	3.25	4	3	3	3	3	3	4	5	4	4	3	3.54545	3	3	4	4	3	3	4	4	3.5	3	2	3	3	3	3	3	3	3	3	2.9
162	2	14	5	无	3	5	5	5	5	5	4	4.83333	1	5	4	4	3.5	5	5	5	4	3	5	5	5	5	5	5	4.72727	3	1	2	3	3	2	3	3	2.5	2	3	4	3	3	3	3	3	4	1	2.9
163	1	14	5	有/5天	1	4	3	5	5	5	4	4.33333	1	4	4	3	3	3	3	4	2	4	4	4	4	4	3	3	3.45455	2	4	2	2	2	2	2	2	2.25	2	2	4	4	4	4	4	4	5	4	3.7
164	1	14	5	无	2	4	3	3	3	4	3	3.33333	1	5	4	3	3.25	4	4	4	3	2	4	4	5	5	4	3	3.81818	3	3	3	3	3	2	3	3	2.875	2	3	3	4	3	3	3	4	3	4	3.2
165	2	15	6	无	4	3	4	4	3	3	4	3.5	2	3	2	3	2.5	4	3	4	3	4	4	4	4	4	4	3	3.72727	3	3	4	2	3	4	3	3	3.125	3	4	4	4	2	3	3	2	4	4	3.3
166	1	14	6	无	1	4	3	4	5	5	4	4.16667	1	5	5	5	4	5	5	5	3	5	5	5	5	5	5	5	4.81818	3	4	2	1	1	1	1	1	1.75	5	5	5	4	3	5	5	5	5	5	4.7
167	2	14	6	无	2	3	4	4	3	5	4	3.83333	3	5	4	4	4	5	5	5	3	5	5	5	5	5	5	2	4.54545	3	5	4	3	3	3	5	3	3.625	3	4	4	3	3	3	4	4	4	4	3.6
168	2	14	6	无	1.5	4	4	3	4	4	3	3.66667	2	3	2	3	2.5	3	3	3	2	5	5	5	5	5	5	3	4	3	3	3	4	4	3	3	4	3.375	3	3	2	3	1	2	3	3	3	2	2.5
169	2	15	6	无	1.5	4	4	5	5	5	5	4.66667	3	5	4	5	4.25	5	5	5	3	3	5	4	5	4	3	3	4.09091	4	3	4	2	3	4	4	3	3.375	3	5	3	3	3	3	3	5	5	3	3.6
170	2	14	7	无	2	4	3	5	5	5	4	4.33333	4	4	4	2	3.5	5	5	5	3	4	4	5	5	5	4	4	4.45455	5	5	5	5	3	4	4	4	4.375	3	4	4	4	3	3	5	5	5	5	4.1
171	2	13	6	无	1	3	4	3	4	3	4	3.5	2	3	3	3	2.75	3	3	3	2	3	3	4	4	4	5	5	3.54545	5	2	2	3	4	3	2	3	3	2	2	2	2	3	3	3	3	3	2	2.5
172	1	14	5	无	1	3	3	4	3	3	4	3.33333	4	4	4	3	3.75	3	3	3	3	4	3	5	5	5	4	4	3.81818	4	4	5	3	2	4	4	3	3.625	2	3	3	3	3	3	4	4	4	3	3.2
173	1	14	4	无	1	2	2	3	3	3	3	2.66667	1	5	5	5	4	4	5	4	2	3	3	3	5	5	2	1	3.36364	5	5	5	5	4	4	5	4	4.625	1	2	2	3	4	4	4	4	4	3	3.1
174	2	14	6	无	1.5	3	4	5	4	5	4	4.16667	2	4	2	2	2.5	4	4	5	3	4	3	4	5	5	5	3	4.09091	5	4	5	3	3	2	4	4	3.75	1	1	1	1	1	4	2	1	1	1	1.4
175	1	14	6	无	1.5	3	3	4	4	5	4	3.83333	4	4	4	4	4	4	5	3	3	4	4	5	5	5	4	3	4.09091	3	4	3	3	3	4	2	2	3	3	5	4	4	3	3	3	5	5	3	3.8
176	1	14	6	无	1	3	3	4	3	3	3	3.16667	2	3	2	4	2.75	3	3	4	2	4	3	4	5	5	5	4	3.81818	3	3	5	5	3	3	4	3	3.625	2	3	2	3	3	4	4	4	4	3	3.2
177	1	14	6	无	1	3	1	3	1	3	2	2.16667	2	4	3	5	3.5	2	2	2	1	5	2	4	4	4	3	2	2.81818	5	4	5	5	5	1	1	3	3.625	1	2	1	1	4	4	5	3	3	1	2.5
178	2	14	9	无	2	5	5	5	3	3	5	4.33333	4	5	5	5	4.75	5	5	5	3	5	5	5	5	5	5	5	4.81818	2	1	1	5	5	1	4	1	2.5	2	5	5	5	3	3	5	5	5	5	4.3
179	1	15	6	无	2	3	3	4	4	4	3	3.5	1	4	3	3	2.75	4	3	4	2	2	3	5	5	5	3	3	3.54545	5	5	1	5	3	1	3	3	3.25	3	3	4	4	3	2	4	4	4	4	3.5
180	2	13	6	无	2	3	3	4	4	3	3	3.33333	3	3	3	3	3	4	3	4	2	3	3	4	4	4	3	3	3.36364	3	4	4	4	4	4	4	3	3.75	2	3	3	3	3	4	4	4	4	4	3.4
181	1	14	8	无	3	5	5	5	5	5	5	5	2	5	5	5	4.25	5	5	5	5	5	5	5	5	5	5	5	5	5	1	1	2	1	1	4	1	2	1	5	5	5	4	5	3	2	3	4	3.7
182	2	14	5	无	1	3	2	3	3	3	4	3	1	4	5	5	3.75	5	3	3	2	5	4	5	5	5	5	3	4.09091	3	3	4	3	4	5	5	3	3.75	2	2	2	2	3	3	3	3	3	3	2.6
183	2	13	9	无	2	4	4	5	5	5	5	4.66667	1	5	5	5	4	5	5	5	4	4	5	5	5	5	4	4	4.63636	1	1	1	1	1	3	4	1	1.625	5	4	5	5	5	4	4	4	4	4	4.4
184	2	13	6	无	2.5	4	4	4	5	5	5	4.5	1	5	5	4	3.75	4	4	5	5	3	4	5	5	5	4	4	4.36364	3	2	5	5	4	2	4	3	3.5	4	4	4	3	5	4	5	5	5	5	4.4
185	2	13	6	无	5	3	4	4	4	4	3	3.66667	5	5	5	5	5	4	4	5	4	5	5	5	5	5	5	5	4.72727	1	2	1	3	2	3	3	2	2.125	3	3	4	3	2	3	3	4	4	3	3.2
186	1	14	6	无	1.5	5	4	5	4	5	5	4.66667	2	4	2	3	2.75	3	3	5	3	3	3	5	5	3	3	3	3.54545	4	5	5	4	3	4	4	4	4.125	3	3	3	4	4	3	4	4	4	4	3.6
187	1	14	6	无	2	4	4	4	4	4	3	3.83333	4	5	3	3	3.75	2	2	3	2	4	3	4	4	4	4	3	3.18182	4	3	2	3	3	3	2	2	2.75	3	3	3	4	3	3	4	4	4	4	3.5
188	1	13	6	无	1.5	4	5	4	5	5	5	4.66667	2	4	4	4	3.5	4	4	5	3	5	4	5	5	5	5	5	4.54545	3	2	4	2	2	4	3	1	2.625	4	4	4	3	2	4	5	5	4	4	3.9
189	1	15	6	无	2	5	5	4	4	4	4	4.33333	1	4	2	3	2.5	5	4	5	3	5	5	5	5	5	5	3	4.54545	3	2	2	4	3	2	3	2	2.625	2	2	2	3	2	3	2	2	2	2	2.2
190	1	14	8	无	3	5	5	5	4	5	5	4.83333	1	4	1	4	2.5	5	2	5	2	2	2	5	5	5	2	2	3.36364	5	5	2	1	2	5	5	2	3.375	4	4	4	4	2	3	4	4	4	4	3.7
191	1	13	7	有/3个月	1	4	3	4	3	4	5	3.83333	3	5	5	4	4.25	3	3	5	5	4	3	4	4	4	5	3	3.90909	1	3	2	3	3	1	3	5	2.625	4	3	3	4	5	5	4	4	3	1	3.6
192	2	14	5	无	1.5	4	3	4	5	5	3	4	1	3	2	2	2	4	4	4	2	4	4	4	4	4	4	5	3.90909	5	3	5	4	5	1	3	2	3.5	1	3	3	3	2	2	4	4	4	4	3
193	1	14	5	无	2	3	3	3	4	4	4	3.5	3	4	3	3	3.25	4	3	4	3	4	4	4	4	4	4	4	3.81818	3	3	3	3	3	3	3	3	3	3	3	3	4	3	3	4	3	3	3	3.2
194	1	13	5	无	3	2	2	2	2	3	3	2.33333	2	4	4	4	3.5	3	2	4	2	3	3	4	4	3	3	3	3.09091	4	5	4	4	2	4	4	3	3.75	2	2	3	2	2	2	2	2	2	2	2.1
195	2	14	5	无	2	4	3	4	4	4	4	3.83333	2	4	3	4	3.25	4	3	3	2	3	3	3	4	3	3	3	3.09091	4	4	3	2	3	2	3	3	3	2	3	3	3	3	4	3	4	4	3	3.2
196	2	14	6	无	3	2	3	4	3	5	4	3.5	2	2	2	2	2	4	4	5	3	3	3	3	3	4	3	3	3.45455	3	4	4	5	3	2	4	1	3.25	3	3	3	4	3	5	5	5	5	5	4.1
197	1	14	5	无	1.5	4	2	5	5	5	5	4.33333	1	5	3	5	3.5	4	3	5	1	1	3	5	5	5	3	1	3.27273	5	5	5	5	5	5	5	5	5	1	1	1	1	1	5	5	5	1	5	2.6
198	1	15	5	无	2	1	1	1	1	1	1	1	1	1	1	1	1	5	1	1	1	1	2	5	5	5	1	1	2.54545	5	5	3	5	5	2	5	5	4.375	1	2	5	1	1	1	2	2	2	2	1.9
199	1	14	6	无	2	5	5	4	4	3	3	4	4	4	5	5	4.5	2	2	3	3	2	3	4	5	4	4	4	3.27273	3	2	3	2	1	3	3	2	2.375	2	4	5	4	3	3	5	2	3	4	3.5
200	1	15	5	无	1	3	3	3	2	3	3	2.83333	2	3	4	4	3.25	2	3	2	1	3	2	4	5	4	3	3	2.90909	3	5	5	1	4	4	5	3	3.75	1	1	1	1	1	3	2	3	3	3	1.9
201	1	12	9	无	2.5	3	3	3	3	3	4	3.16667	1	4	4	4	3.25	3	3	3	3	3	3	4	5	5	3	3	3.45455	4	4	4	3	3	3	3	3	3.375	2	2	2	3	3	3	3	3	3	4	2.8
202	1	15	5	无	2	4	2	3	3	4	4	3.33333	1	5	3	3	3	4	2	5	2	5	3	1	5	5	3	2	3.36364	2	3	4	4	4	4	4	4	3.625	5	3	3	2	1	4	4	4	4	5	3.5
203	2	15	5	无	1.5	4	4	5	5	5	5	4.66667	3	5	3	2	3.25	5	4	5	3	4	4	5	5	5	4	3	4.27273	4	3	3	3	3	2	4	2	3	3	3	4	5	3	3	5	5	5	4	4
204	2	14	5	无	1	3	3	3	3	3	3	3	2	2	3	3	2.5	2	3	3	1	3	3	4	4	3	3	3	2.90909	3	2	2	3	4	3	4	3	3	4	3	4	3	2	3	3	2	2	2	2.8
205	2	14	9	有/7年	1	4	4	3	3	3	3	3.33333	1	3	2	3	2.25	3	3	5	2	2	3	4	4	4	3	3	3.27273	3	3	4	2	4	5	5	4	3.75	3	3	3	2	3	2	5	5	5	3	3.4
206	1	14	5	无	3	3	3	5	5	4	5	4.16667	5	5	3	3	4	3	5	5	1	5	3	3	4	5	5	4	3.90909	4	4	1	5	3	3	5	1	3.25	3	3	4	3	5	1	5	5	5	3	3.7
207	1	15	7	无	1	5	5	4	4	4	3	4.16667	1	5	5	5	4	5	4	5	3	2	4	5	5	5	2	2	3.81818	3	3	1	3	3	3	3	2	2.625	5	5	5	4	3	5	2	5	5	3	4.2
208	2	13	5	无	2	4	3	5	5	5	4	4.33333	3	5	4	5	4.25	3	3	3	3	3	5	5	5	5	3	4	3.81818	3	3	3	2	4	2	2	3	2.75	2	4	3	2	3	2	4	4	4	2	3
209	2	13	5	无	2.5	3	2	3	3	2	3	2.66667	4	3	3	4	3.5	3	3	3	4	4	4	3	3	1	3	4	3.18182	3	3	3	3	3	2	3	3	2.875	2	3	3	3	3	4	3	4	4	3	3.2
210	2	13	4	无	1	4	2	2	2	2	4	2.66667	4	4	1	1	2.5	2	2	3	3	2	4	5	5	1	5	5	3.36364	3	3	3	3	4	2	4	1	2.875	3	3	3	4	3	5	5	5	5	5	4.1
211	1	14	6	无	1.5	5	2	4	4	3	3	3.5	4	4	3	2	3.25	3	4	4	4	4	3	3	3	3	3	3	3.36364	4	3	1	2	4	5	5	5	3.625	1	1	1	1	1	5	5	5	1	5	2.6
212	1	13	4	无	2	3	3	3	3	3	3	3	3	3	3	3	3	3	3	3	3	3	3	3	3	3	3	3	3	3	3	3	3	3	2	5	5	3.375	1	2	5	1	1	1	2	2	2	2	1.9
213	2	13	4	无	1.5	2	4	4	4	5	4	3.83333	3	4	2	3	3	3	3	4	4	3	2	3	2	3	3	4	3.09091	4	4	4	1	2	1	3	3	2.75	2	3	1	1	3	3	1	2	1	3	2
214	2	13	6	无	2	5	1	4	3	5	2	3.33333	3	5	1	4	3.25	4	5	5	5	5	1	2	5	2	3	3	3.63636	2	2	3	3	1	3	3	3	2.5	3	2	3	3	2	3	4	3	3	4	3
215	2	14	7	无	3	3	2	2	2	2	2	2.16667	2	2	2	4	2.5	4	3	3	3	3	3	3	3	3	3	3	3.09091	3	4	3	3	3	5	1	5	3.375	5	5	5	1	1	1	1	4	2	4	2.9
216	1	14	6	无	1	3	1	3	2	2	4	2.5	3	3	2	5	3.25	3	4	4	4	4	2	3	3	2	2	2	3	2	4	1	2	3	3	4	3	2.75	1	2	3	4	3	3	4	2	4	2	2.8
217	2	14	9	无	1.5	4	2	2	2	2	2	2.33333	2	3	2	2	2.25	4	4	4	5	5	3	2	5	4	4	4	4	4	4	4	2	4	4	5	5	4	4	5	5	2	2	3	4	3	4	4	3.6
218	1	15	6	无	2	5	3	4	5	4	4	4.16667	2	3	3	5	3.25	4	5	5	5	5	5	5	2	3	2	2	3.90909	1	3	1	4	4	3	2	3	2.625	4	4	3	2	2	2	2	2	2	3	2.6
219	2	13	6	无	3	3	2	3	3	3	3	2.83333	3	3	3	3	3	3	4	4	4	3	3	3	3	3	3	3	3.27273	3	3	3	3	3	5	5	2	3.375	4	5	4	1	1	1	4	2	4	3	2.9
220	1	14	8	无	2	3	3	3	3	3	3	3	3	3	3	3	3	3	3	3	3	3	3	3	3	3	3	3	3	3	3	3	3	3	3	5	3	3.25	2	3	5	3	2	2	2	3	3	3	2.8
221	2	14	5	无	1	3	4	5	4	2	3	3.5	3	3	1	5	3	1	1	2	3	3	3	3	3	3	3	3	2.54545	3	3	3	3	3	4	3	3	3.125	4	3	4	4	3	3	4	4	4	4	3.7
222	2	13	9	无	1.5	2	3	2	5	3	5	3.33333	3	4	3	5	3.75	3	5	3	5	4	5	1	4	1	2	1	3.09091	5	1	1	3	3	3	4	3	2.875	3	3	2	5	5	5	5	3	5	5	4.1
223	2	13	6	无	2	5	3	5	3	4	5	4.16667	5	5	3	4	4.25	4	4	4	4	4	4	3	3	3	3	2	3.45455	3	3	2	3	4	1	1	3	2.5	2	2	1	3	3	3	3	3	3	5	2.8
224	2	13	6	无	2	5	5	5	5	5	5	5	5	5	3	5	4.5	5	5	5	5	5	5	5	5	5	5	5	5	5	3	1	3	4	5	2	2	3.125	2	2	4	4	4	2	2	2	2	4	2.8
225	1	14	6	无	1.5	4	2	3	5	5	3	3.66667	3	5	3	4	3.75	4	5	5	5	4	3	3	3	3	3	3	3.72727	3	3	3	2	3	3	3	3	2.875	3	3	1	5	5	5	5	4	5	5	4.1
226	1	14	6	无	2	3	4	5	3	4	4	3.83333	3	2	1	1	1.75	3	3	5	5	5	3	2	5	1	3	3	3.45455	2	2	3	1	3	3	4	5	2.875	3	4	1	3	3	3	3	4	4	4	3.2
227	1	13	6	无	3	5	5	5	5	4	4	4.66667	4	5	4	5	4.5	5	4	5	5	5	3	1	3	2	3	1	3.36364	3	1	2	3	4	1	2	4	2.5	1	2	2	2	2	2	3	2	2	2	2
228	1	15	6	无	1	3	3	2	3	4	1	2.66667	1	2	1	3	1.75	2	3	3	3	2	2	4	5	4	4	4	3.27273	4	5	3	3	1	2	1	2	2.625	3	2	1	1	1	1	1	4	1	1	1.6
229	1	14	8	无	2.5	4	1	5	3	4	5	3.66667	4	5	1	3	3.25	3	5	5	5	3	1	4	4	1	5	5	3.72727	5	3	1	4	5	5	5	5	4.125	5	5	1	1	1	1	1	1	1	1	1.8
230	1	13	7	无	1.5	3	1	3	3	3	4	2.83333	4	4	3	4	3.75	4	4	4	4	5	4	4	5	5	4	4	4.27273	3	4	3	2	2	4	3	2	2.875	4	5	5	1	1	1	1	1	3	3	2.5
231	2	14	5	无	2	4	3	5	3	3	4	3.66667	3	4	4	3	3.5	5	5	5	5	3	2	3	3	3	2	1	3.36364	1	3	1	3	3	1	1	1	1.75	1	3	1	5	3	5	4	5	4	4	3.5
232	1	14	5	无	2	4	4	4	5	5	5	4.5	4	5	5	4	4.5	3	5	5	5	5	4	4	3	3	3	3	3.90909	3	3	2	3	4	4	4	3	3.25	3	4	4	3	2	3	3	3	3	3	3.1
233	1	13	5	无	5	4	3	1	2	2	3	2.5	2	4	5	5	4	3	3	3	5	5	3	5	5	1	5	5	3.90909	2	5	3	1	3	2	3	3	2.75	2	3	3	2	3	4	3	3	3	3	2.9
234	2	14	5	无	2	5	1	1	1	1	4	2.16667	5	5	5	5	5	5	5	5	5	4	5	1	2	5	3	5	4.09091	1	1	1	5	5	2	2	2	2.375	2	2	2	2	2	4	4	4	4	4	3
235	2	14	6	无	3	3	3	3	2	3	3	2.83333	2	2	2	2	2	2	3	3	3	2	1	3	3	2	4	4	2.72727	4	4	2	3	2	3	3	3	3	2	3	3	2	3	3	4	3	3	3	2.9
236	1	14	5	无	1	5	3	4	4	4	5	4.16667	5	4	3	5	4.25	4	5	5	5	5	5	1	3	2	1	1	3.36364	1	2	2	3	4	4	2	3	2.625	4	3	3	3	4	4	4	2	3	3	3.3
237	1	15	5	无	5	5	3	5	4	4	5	4.33333	5	5	4	5	4.75	4	5	5	5	5	3	4	4	2	1	2	3.63636	2	3	2	2	4	2	1	1	2.125	1	1	1	5	5	5	4	3	5	5	3.5
238	1	14	6	无	5	5	3	1	1	3	5	3	3	5	3	5	4	5	5	5	5	4	3	5	5	4	5	5	4.63636	1	5	1	5	5	4	3	3	3.375	3	5	3	3	4	4	3	3	3	4	3.5
